# Supplementary material for: Methodology for the Assessment of the Ecotoxicological Potential of Construction Materials
Source: MDPI journal article supplement (doi:10.3390/ma10060649), 2017-06-13

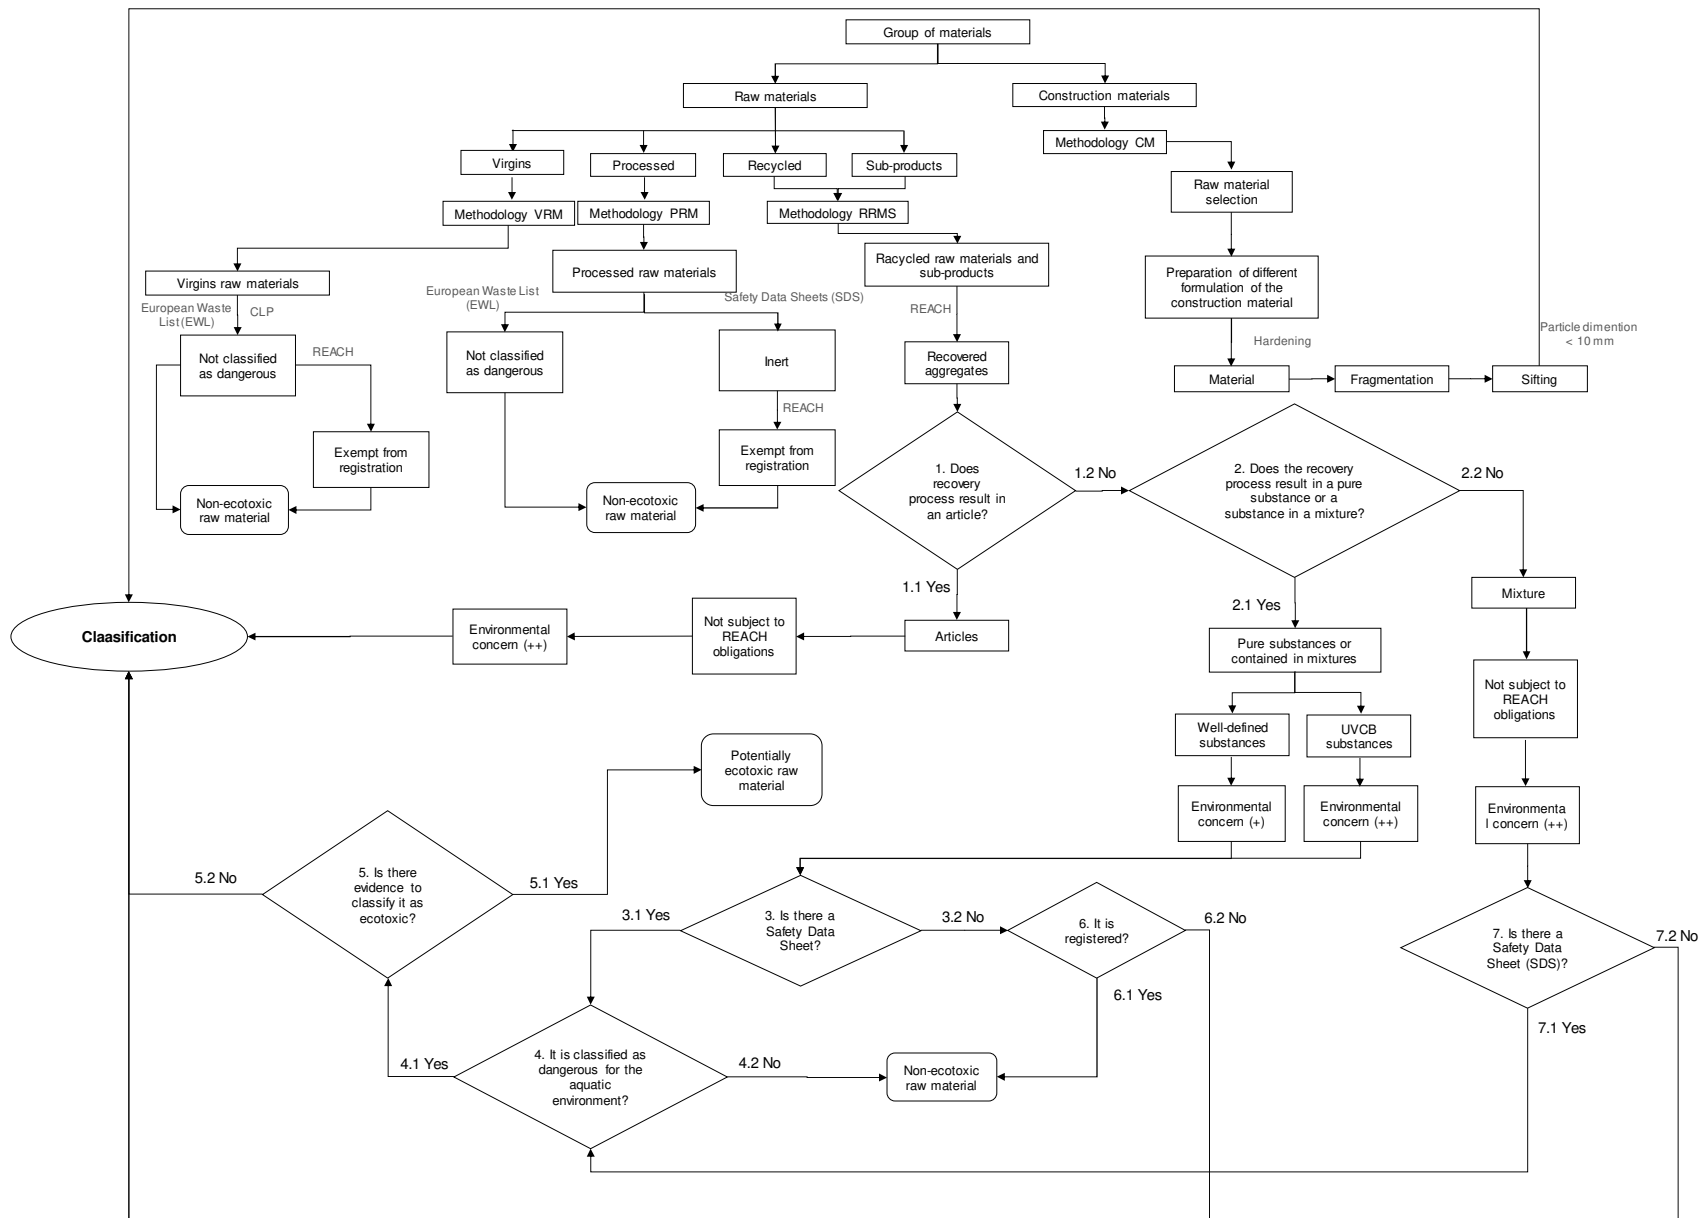

Supplement: s1 [file s1]
